# Supplementary material
Source: publisher figshare collection journal article supplement (https://karger.figshare.com/articles/dataset/_/7951154)
Supplement: Supplementary file 1 [file 1]

Archive with 24 entries (24 files):
- Guidance Booklet.pdf
- Item 1_ER Setting_interactive.pdf
- Item 2c_Outpatient Setting_interactive.pdf
- Item 4_Hospital Setting_interactive.pdf
- Item 6_Hospital Setting_interactive.pdf
- Item 7a_Hospital Setting_interactive.pdf
- Item 10_Outpatient Setting_interactive.pdf
- Item 2c_Outpatient Setting.pdf
- Item 7a_Hospital Setting.pdf
- Item 7b Outpatient Setting.pdf
- Item 8_Hospital Setting.pdf
- Item 6_Hospital Setting.pdf
- Item 9b_Outpatient Setting.pdf
- Item 2a_ER Setting.pdf
- Item 2b_Hospital Setting.pdf
- Item 1_ER setting.pdf
- Item 3_ER Setting.pdf
- Item 4_Hospital Setting.pdf
- Item 5a_Hospital Setting.pdf
- Item 5b_Outpatient Setting.pdf
- Item 8_Hospital Setting_interactive.pdf
- Item 7b_Outpatient Setting_Interactive.pdf
- Item 9a_Hospital Setting.pdf
- Item 10_Outpatient Setting.pdf
