# Supplementary material
Source: publisher figshare collection journal article supplement (https://karger.figshare.com/articles/dataset/_/7951154)
Supplement: Supplementary file 1 [file 1 › Guidance Booklet.pdf]

# Guidance document

Heart Failure Toolbox

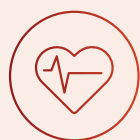

# Introduction and overview of the Heart Failure Toolbox

- Heart failure (HF) is associated with significant morbidity and mortality and consequently, it places an enormous burden on patients, healthcare practitioners (HCPs) and healthcare systems worldwide<sup>1</sup>
- There are considerable unmet needs in relation to the management of HF within Asia-Pacific, Middle East and African countries (the 'Region'), including:
  - Limited education about HF for HCPs, as well as patients and their caregivers
  - Lack of multidisciplinary teams (MDTs) for the management of HF and quality measures to monitor standards of care
  - Insufficient resources to support long-term follow-up of patients
- We have developed a set of checklists, algorithms and templates, and other practical resources (a 'HF Toolbox'), to support the management of patients with acute HF (AHF) and patients with chronic HF with reduced ejection fraction (HFrEF) in the Region, with the objective to facilitate the formation of HF programs
- The HF Toolbox has been created based on our experiences as a group of cardiologists from the Region, as well as on current evidence and international guidelines. As such the resources include items that:
  - We have developed as a group
  - Are endorsed by international societies, such as the European Society of Cardiology (ESC)
- Tools are freely available to HCPs and are intended to provide general guidance to support the management of patients with HF. Tools may be:
  - Used individually or with one another
  - Adapted in-line with local requirements (e.g. translated)
- The HF Toolbox is expected to be useful for all HCPs involved in the management of patients with AHF and patients with chronic HFrEF, regardless of healthcare infrastructure and available resources
  - Institutions that have initiated the set-up of a HF program or those that would like to build a HF program may find the HF Toolbox resources particularly helpful

## Items within the HF Toolbox

- The HF Toolbox will support and streamline the management of patients with HF from presentation at the Emergency Room (ER), during hospital stay and throughout long-term outpatient care. As such, toolbox items are categorized according to healthcare setting:
  - ER setting 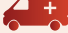
  - Hospital setting 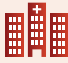
  - Outpatient setting 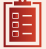
- Further information on each of the items can be found below

| HF Toolbox item                                    | 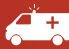 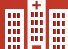 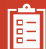 |                  |                    |
|----------------------------------------------------|-------------------------------------------------------------------------------------------------------------------------------------------------------------------------------------------------------------------------------------------------------------|------------------|--------------------|
|                                                    | ER setting                                                                                                                                                                                                                                                  | Hospital setting | Outpatient setting |
| 1. Emergency assessment checklist                  | ✓                                                                                                                                                                                                                                                           |                  |                    |
| 2. Treatment recommendations                       | ✓                                                                                                                                                                                                                                                           | ✓                | ✓                  |
| 3. Criteria for CCU admission                      | ✓                                                                                                                                                                                                                                                           |                  |                    |
| 4. Admission orders checklist                      |                                                                                                                                                                                                                                                             | ✓                |                    |
| 5. Members of the multidisciplinary team           |                                                                                                                                                                                                                                                             | ✓                | ✓                  |
| 6. Nursing chart                                   |                                                                                                                                                                                                                                                             | ✓                |                    |
| 7. Patient education and self-management resources |                                                                                                                                                                                                                                                             | ✓                | ✓                  |
| 8. Pre-discharge checklist                         |                                                                                                                                                                                                                                                             | ✓                |                    |
| 9. List of quality measures                        |                                                                                                                                                                                                                                                             | ✓                | ✓                  |
| 10. Standardized HF chart                          |                                                                                                                                                                                                                                                             |                  | ✓                  |

CCU=Coronary Care Unit; ER=Emergency Room; HF=heart failure

### Item 1. Emergency assessment checklist

- Two-part checklist to be completed
- To support the emergency assessment of patients who present to the ER with suspected AHF, including history taking, physical examination and initial investigations
- Available in printable and editable electronic formats

### Items 2a, 2b and 2c. Treatment recommendations

- Algorithms to guide the management of patients with AHF/patients with chronic HFrEF:
  - In the ER (Item 2a)
  - During hospital admission (Item 2b)
- A summary of recommendations for pharmacological and non-pharmacological management of patients with HFrEF in the outpatient setting (Item 2c)
- Items are aligned with ESC guideline recommendations<sup>2</sup>

### Item 3. Criteria for CCU admission

- List of criteria
- To aid decision-making in terms of admission of patients with AHF to the CCU, rather than an ordinary ward
- Criteria are based on those provided by the ESC<sup>2</sup>

### Item 4. Admission orders checklist

- Checklist to be completed
- To support the assessment and management of patients in the inpatient setting, including:
  - The implementation of individualized pharmacological and non-pharmacological treatment strategies
  - Laboratory and imaging assessments to be undertaken
  - Nursing monitoring/activities
  - Patient education
- To be completed for each patient upon hospital admission
- Available in printable and editable electronic formats

### Item 5. Members of the MDT

- Recommendations for establishing a MDT to streamline the long-term management of HF, including:
  - Which HCPs should form part of the team
  - The roles and responsibilities of each HCP within the team
- Occupations are listed from highest to lowest priority for inclusion within the MDT, so that the most vital roles can be easily identified and implemented

### Item 6. Nursing chart

- Chart to be completed
- To support the monitoring of patients with AHF during their stay in hospital, including:
  - Assessment of main organ systems
  - Identification of actions for the healthcare team
- This item has been adapted from a chart on a website that provides various resources for nurses<sup>3</sup>
- Available in printable and editable electronic formats

### Item 7. Patient education and self-management resources

- Booklet to be given to patients with HF either during their stay in hospital or in the outpatient setting
- To support the provision of patient education, in order to increase understanding of HF and its management, by presenting information in relation to:
  - The symptoms of HF
  - Medication options
  - The importance of:
    - A healthy lifestyle, considering nutrition and diet, activity and weight management
    - Follow-up appointments
  - When to seek further medical treatment
  - Other useful educational resources and mobile applications
- To help patients understand key aspects of self-management and allow them to proactively manage their HF as an outpatient (with support and advice from their healthcare team), a HF self-management checklist is provided, as well as links to the following self-care resources:
  - Warning signs information sheet\*
  - Symptom and event diary\*
  - Signs chart\*
  - Appointment record\*

## Item 8. Pre-discharge checklist

- Checklist to be completed prior to discharge from hospital
- To facilitate smooth transition of care from the inpatient to the outpatient setting
- Includes space to record:
  - Patient characteristics such as etiology of HF, comorbidities and reason for decompensation
  - Treatment plan
  - Discharge instructions for the MDT
- Available in printable and editable electronic formats

## Items 9a and 9b. List of quality measures

- Recommendations for key performance indicators that should be monitored on a yearly basis, to determine if standards of care are met or maintained, or should be improved:
  - In the hospital setting (Item 9a)
  - In the outpatient setting (Item 9b)
- The lists of quality measures provided are based on ESC guideline recommendations<sup>2</sup> and encompass:
  - Assessment of patients
  - Provision of patient education
  - Use of guideline-recommended therapies
  - Patient and hospitalization outcomes

## Item 10. Standardized HF chart

- Chart to be completed at the first outpatient evaluation (sheets 1–3) and during all subsequent visits (sheet 3) either following hospital discharge or following referral from primary care (patients with HFrEF not hospitalized for acute decompensation)
- To support long-term follow-up of patients, including monitoring of:
  - Vital signs
  - Symptoms
  - Left ventricular ejection fraction
  - New York Heart Association class
  - Laboratory test results
  - Patient education
- Available in printable and editable electronic formats

## Closing remarks

- We believe that use of the HF Toolbox will support the implementation of practices that address unmet needs in HF management within the Region, and assist in standardizing HF care, which may ultimately improve patient outcomes
- We recommend that HF Toolbox items, such as completed charts and checklists, are shared across the MDT (e.g. hospital admission/monitoring/discharge checklists should be provided to outpatient clinics) to ensure that HCPs involved in the care of patients with HF have access to all available information, thus helping integrate care across the different settings
- We hope that you find the HF Toolbox to be a valuable resource

With thanks and best wishes,

Samer Kabbani (*Rafik Hariri University Hospital, Beirut, Lebanon*)

Waleed Al Habeeb (*King Saud University, Riyadh, Saudi Arabia*)

Houng-Bang Liew (*Queen Elizabeth Hospital, Kota Kinabalu, Malaysia*)

JC Mohan (*Jaipur Golden Hospital, Rohini, Delhi, India*)

Elijah Ogola (*University of Nairobi, Nairobi, Kenya*)

David Sim (*National Heart Centre Singapore, Singapore*)

Nqoba Tsabedze (*University of the Witwatersrand, Gauteng, South Africa*)

## References

1. Cowie et al. ESC Heart Failure 2014;1:110–45
2. Ponikowski et al. Eur Heart J 2016;37:2129–200
3. Straight A Nursing. Available from: <http://www.straightnursingstudent.com/study-aids/brain-sheets/>
4. The Heart Failure Association of the European Society of Cardiology. Heartfailurematters.org. Available from: [http://www.heartfailurematters.org/en\\_GB](http://www.heartfailurematters.org/en_GB)
