# Supplementary material
Source: publisher figshare collection journal article supplement (https://karger.figshare.com/articles/dataset/_/7951154)
Supplement: Supplementary file 1 [file 1 › Item 1_ER Setting_interactive.pdf]

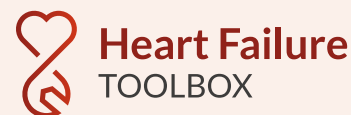

# Emergency assessment of patients with acute heart failure

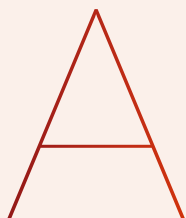

## Patient history and physical examination

- Identify history of symptoms, including onset and duration

- Identify history of previous heart failure admissions

- Identify history of cardiac disease and left ventricular ejection fraction

- Identify history of precipitating factors leading to decompensation

- ☐ Acute coronary syndrome
- ☐ Hypertensive emergency
- ☐ Rapid arrhythmias or severe bradycardia
- ☐ Acute mechanical cause
- ☐ Acute pulmonary embolism
- ☐ Acute infectious process
- ☐ Poor compliance with medication
- ☐ Others (*please specify below*)

- Physical examination to identify:

Presence of congestion    Yes ☐    No ☐

Adequate perfusion    Yes ☐    No ☐

- Identify vital signs including:

Blood pressure   

Pulse rate   

Oxygen saturation



# Emergency assessment of patients with acute heart failure

## B

### Initial investigation of patients with acute heart failure

- Check what is applicable to your patient

#### Laboratory tests:

- ☐ CBC
- ☐ BUN, Cr, estimated GFR
- ☐ Electrolytes
- ☐ Troponin level
- ☐ BNP or NT-proBNP
- ☐ Liver function tests
- ☐ Urine analysis and urine culture
- ☐ PT INR (if patient is on anticoagulation)
- ☐ Blood glucose level
- ☐ TSH (can be done during admission)

#### Cardiac imaging and diagnostics:

- ☐ 12-lead EKG
- ☐ Chest X-ray
- ☐ Echocardiography
