# Supplementary material
Source: publisher figshare collection journal article supplement (https://karger.figshare.com/articles/dataset/_/7951154)
Supplement: Supplementary file 1 [file 1 › Item 2a_ER Setting.pdf]

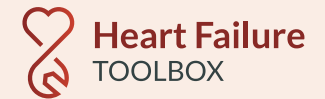

# ER management of patients with acute heart failure with fluid overload

## ACUTE ONSET OF DYSPNEA

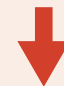

Oxygen therapy if SpO<sub>2</sub> <90%

**Fluid overload with pulmonary congestion**

**Hypertensive (SBP >140 mmHg)**

- Start i.v. nitrates<sup>a</sup>/vasodilators
- Start i.v. diuretic<sup>b</sup>

**Normotensive (SBP 100–139 mmHg)**

- Start i.v. diuretic<sup>b</sup>
- Consider adding nitrates<sup>a</sup>

**Hypotensive (SBP <90 mmHg)**

- Start inotropic agent (dobutamine<sup>c</sup>)
- Add i.v. diuretic (use with caution)<sup>b</sup>

ER=Emergency Room; HF=heart failure; i.v.=intravenous; SBP=systolic blood pressure; SpO<sub>2</sub>=blood oxygen saturation

<sup>a</sup>Dosing starting with 5 µg/min continuous infusion, with up-titration to keep SBP <140 mmHg and >90 mmHg

<sup>b</sup>Furosemide dosing 20–40–80 mg i.v. depending on chronic treatment of HF and renal function

<sup>c</sup>Dosing starting with 2 µg/kg/min, with up-titration to 20 µg/kg/min and monitoring of urine flow, heart rate and ventricular ectopies
