# Supplementary material
Source: publisher figshare collection journal article supplement (https://karger.figshare.com/articles/dataset/_/7951154)
Supplement: Supplementary file 1 [file 1 › Item 2b_Hospital Setting.pdf]

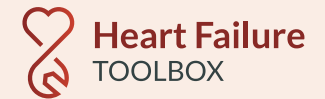

# Management of hospitalized patients with acute heart failure

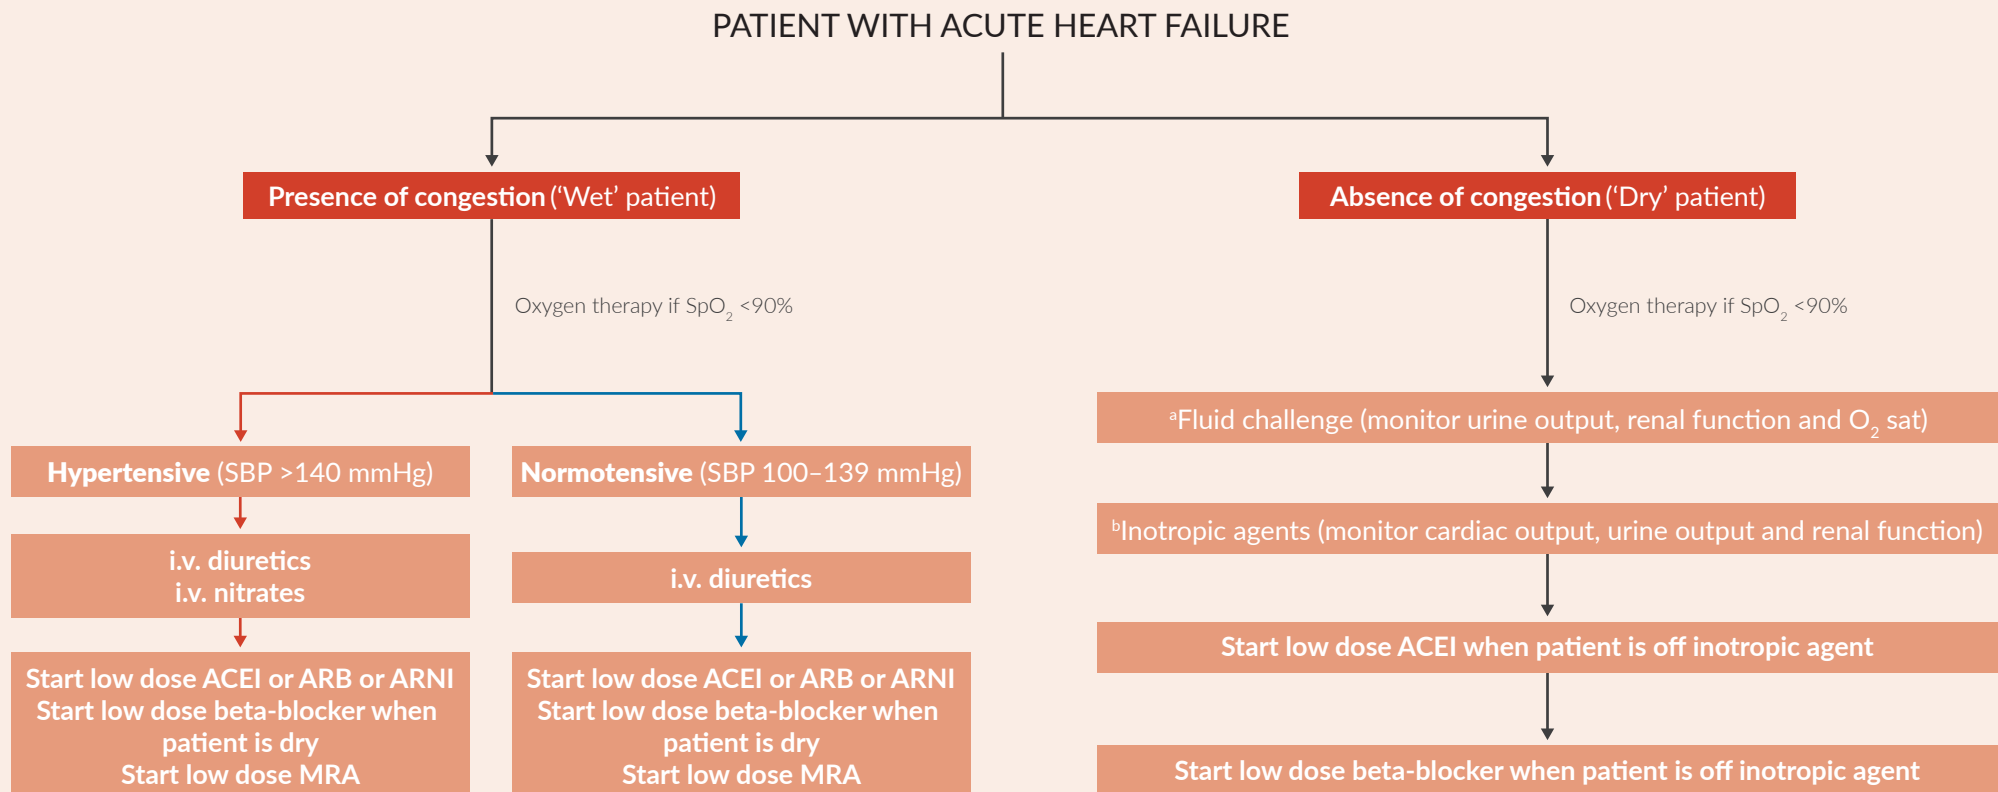

ACEI=angiotensin-converting-enzyme inhibitor; ARB=angiotensin receptor blocker; ARNI=angiotensin receptor neprilysin inhibitor; i.v.=intravenous; MRA=mineralocorticoid receptor antagonist; O<sub>2</sub> sat=oxygen saturation; SBP=systolic blood pressure; SpO<sub>2</sub>=blood oxygen saturation

<sup>a</sup>Fluid challenge for patients who are hypoperfused and hypovolemic with low urine output and elevated creatinine levels

<sup>b</sup>Inotropic agents for patients who are hypoperfused with low urine output after receiving fluid challenge
