# Supplementary material
Source: publisher figshare collection journal article supplement (https://karger.figshare.com/articles/dataset/_/7951154)
Supplement: Supplementary file 1 [file 1 › Item 2c_Outpatient Setting_interactive.pdf]

# Outpatient guidelines for the management of patients with chronic heart failure

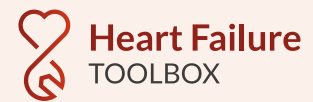

## Recommendations for pharmacological treatments in patients with HFrEF

- An ACEI (or ARB if ACEI is not tolerated/contraindicated) is recommended, in addition to a beta-blocker, in all patients with symptomatic HFrEF. Addition of an MRA is recommended if a patient's symptoms persist despite receiving an ACEI and a beta-blocker.
- Other pharmacological treatments for patients with HFrEF include ARNI (recommended to replace ACEI in patients who remain symptomatic despite treatment with an ACEI, beta-blocker and MRA), diuretics, hydralazine and isosorbide dinitrate, and  $I_f$ -channel blockers. Treatments for which the benefits in patients with HFrEF are less certain include digoxin.
- For more information on recommended pharmacological treatments for patients with HFrEF, please see '*Pharmacological treatments indicated in patients with symptomatic (NYHA Class II–IV) heart failure with reduced ejection fraction*' and '*Other pharmacological treatments recommended in selected patients with symptomatic (NYHA Class II–IV) heart failure with reduced ejection fraction*' in the 2016 ESC guidelines, which can be found [here](#).

## Treatments that should be avoided in patients with heart failure

- Various pharmacological agents have the potential to cause harm to patients with HF and as such, are not recommended for use in these patients. Example medications include thiazolidinediones (glitazones), NSAIDs, COX-2 inhibitors, diltiazem and verapamil, which have all been associated with increased risk of HF worsening and HF hospitalization.
- Adding an ARB or renin inhibitor to combination therapy with an ACEI and an MRA is also not recommended in patients with HF, owing to the increased risk of renal dysfunction and hyperkalemia.
- For more information on treatments and treatment combinations that should be avoided in patients with HF, please see '*Treatments (or combinations of treatments) that may cause harm in patients with symptomatic (NYHA Class II–IV) heart failure with reduced ejection fraction*' in the 2016 ESC guidelines, which can be found [here](#).

## Target doses of pharmacological treatments for patients with heart failure

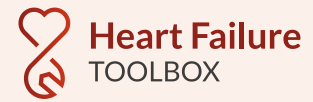

- Several different pharmacological therapies are available for the treatment of HF, including ACEIs, ARBs, ARNI, beta-blockers,  $I_f$ -channel blockers and MRAs. Each of these agents has an initial recommended starting dose, which should be up-titrated to the maximum tolerated evidence-based dose.
- For more information on the recommended starting doses and target doses for these medications, please see Table 7.2 in the 2016 ESC guidelines, which can be found [here](#).

## Recommendations for implantable cardiac defibrillators and cardiac resynchronization therapy

### ICDs

- Many deaths among patients with HF occur suddenly and unexpectedly, often because of electrical disturbances, such as ventricular arrhythmias and bradycardia.
- ICDs have demonstrated efficacy in preventing bradycardia and correcting potentially lethal ventricular arrhythmias and as such, are recommended for the primary and secondary prevention of sudden cardiac death in patients with HF.
- In certain patients, ICD implantation is not recommended; in others, a wearable ICD may be appropriate (e.g. in patients who are at risk of sudden cardiac death for a limited period only).
- For more information regarding the use of ICDs in patients with HF, please see the '*Recommendations for implantable cardioverter-defibrillator in patients with heart failure*' outlined in the 2016 ESC guidelines, which can be found [here](#).

### CRT

- In appropriately selected patients with HF, CRT has been shown to improve cardiac performance, symptoms and well-being, and reduce morbidity and mortality.
- For more information regarding which patients are suited and not suited to CRT, please see the '*Recommendations for cardiac resynchronization therapy implantation in patients with heart failure*' outlined in the 2016 ESC guidelines, which can be found [here](#).

## Recommendations for the prevention of thromboembolism



- In general, patients with HF and AF should receive thromboembolism prophylaxis. However, the patient's clinical status should be carefully considered before an oral anticoagulant is prescribed.
- The risks of thromboembolism and bleeding associated with oral anticoagulation should first be evaluated using the CHA<sub>2</sub>DS<sub>2</sub>-VASc and HAS-BLED scores, respectively.
- Patients deemed eligible to receive thromboembolism prophylaxis may be prescribed an oral anticoagulant, NOAC, oral vitamin K antagonist, intravenous heparin, or LMWH, depending on the patient's clinical profile.
- For more information on thromboembolism prophylaxis, please see the '*Recommendations for the prevention of thrombo-embolism in patients with symptomatic heart failure (NYHA Class II–IV) and paroxysmal or persistent/permanent atrial fibrillation*' outlined in the 2016 ESC guidelines, which can be found [here](#).

## Non-pharmacological recommendations for patients with chronic heart failure

- In patients with HF, exercise training, enrollment into a multidisciplinary care management program, and long-term follow-up/monitoring are all recommended. These approaches can improve symptoms and reduce the risk of HF hospitalization and mortality.
- For more information regarding how these interventions may help patients with HF, please see the '*Recommendations for exercise, multidisciplinary management and monitoring of patients with heart failure*' outlined in the 2016 ESC guidelines, which can be found [here](#).
