# Supplementary material
Source: publisher figshare collection journal article supplement (https://karger.figshare.com/articles/dataset/_/7951154)
Supplement: Supplementary file 1 [file 1 › Item 3_ER Setting.pdf]

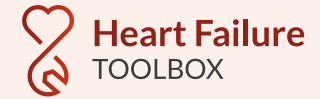

# Criteria for hospitalization in the Coronary Care Unit

Coronary Care Unit admission if any one of the following criteria is met (otherwise patient can be managed on a regular ward):

- Need for intubation or already intubated
- Oxygen saturation <90% despite oxygen therapy
- Hemodynamic instability (systolic blood pressure <90 mmHg)
- Heart rate <40 bpm or >130 bpm
- Recurrent arrhythmias
- Heart failure associated with acute coronary syndrome
