# Supplementary material
Source: publisher figshare collection journal article supplement (https://karger.figshare.com/articles/dataset/_/7951154)
Supplement: Supplementary file 1 [file 1 › Item 4_Hospital Setting_interactive.pdf]

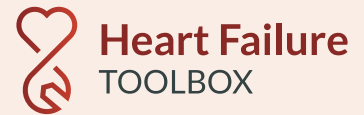

# Admission orders

Date and time of admission:

Under the care of physician:

Diagnosis:

## • Physical examination

- ☐ Warm and wet
- ☐ Warm and dry
- ☐ Cold and wet
- ☐ Cold and dry

## • Activity

- ☐ Strict bed rest
- ☐ Bed to chair as tolerated
- ☐ Bed rest with bathroom privileges
- ☐ Out of bed as tolerated

## • Oxygen therapy

- ☐ Maintain oxygen sat >92%
- ☐ Room air
- ☐ Face mask at  L/min
- ☐ Nasal cannula at  L/min
- ☐ BIPAP
- ☐ CPAP

## • Laboratory orders

- ☐ CBC
  - ☐ BUN, Cr, electrolytes
  - ☐ LFT
  - ☐ BNP or NT-proBNP
  - ☐ Troponin
  - ☐ TSH
  - ☐ Lipid profile
  - ☐ HbA1c
  - ☐ Digoxin level
  - ☐ ABGs
  - ☐ Coagulation profile
  - ☐ U/A and urine culture
  - ☐ Others (please specify below)
- 

## • Diet

- ☐ Low salt diet
- ☐ Fluid restriction:  mL/24 hours
- ☐ Regular diet
- ☐ Keep nothing by mouth

## • Nursing activity

- ☐ Vital signs every 4 hours
- ☐ Vital signs every 8 hours
- ☐ Telemetry
- ☐ Daily weight
- ☐ Strict input and output
- ☐ Insert Foley catheter

☐ Other (please specify below)

## • Imaging orders

- ☐ CXR stat
- ☐ CXR daily
- ☐ EKG stat
- ☐ EKG daily
- ☐ Echocardiography

## • Patient education

- ☐ Smoking cessation
- ☐ Low salt diet
- ☐ Weight monitoring
- ☐ Medication compliance
- ☐ Follow-up appointment

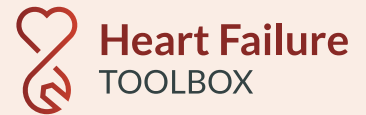

# Admission orders

- **Medical orders (where applicable)**

|                                                         |  |
|---------------------------------------------------------|--|
| <input type="checkbox"/> Diuretic dosing:               |  |
| <input type="checkbox"/> ACEI dosing:                   |  |
| <input type="checkbox"/> ARB dosing:                    |  |
| <input type="checkbox"/> ARNI dosing:                   |  |
| <input type="checkbox"/> Beta-blocker dosing:           |  |
| <input type="checkbox"/> Aldosterone antagonist dosing: |  |
| <input type="checkbox"/> Hydralazine/nitrate dosing:    |  |
| <input type="checkbox"/> Digoxin dosing:                |  |
| <input type="checkbox"/> Ivabradine dosing:             |  |
| <input type="checkbox"/> Anticoagulant dosing:          |  |
| <input type="checkbox"/> VTE prophylaxis:               |  |
| <input type="checkbox"/> Inotrope dosing:               |  |
| <input type="checkbox"/> Others:                        |  |

- **Electrolyte supplement**

|                                              |  |
|----------------------------------------------|--|
| <input type="checkbox"/> Potassium chloride: |  |
| <input type="checkbox"/> Magnesium sulfate:  |  |
| <input type="checkbox"/> Others:             |  |

|                      |  |
|----------------------|--|
| Physician name:      |  |
| Physician signature: |  |
| Date:                |  |
