# Supplementary material
Source: publisher figshare collection journal article supplement (https://karger.figshare.com/articles/dataset/_/7951154)
Supplement: Supplementary file 1 [file 1 › Item 5b_Outpatient Setting.pdf]

# Members of the multidisciplinary team

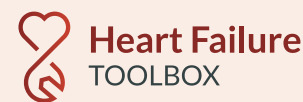

A multidisciplinary team for the management of patients with heart failure should comprise the following individuals:

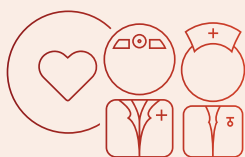

## Specialist cardiologist and heart failure specialty nurse

- The core of the team in a heart failure management program most often comprises a cardiologist and a heart failure nurse
  - Together, they are responsible for the diagnosis, treatment and care of heart failure patients
- The heart failure nurse has a major role in the education and counselling of patients and family, and helping patients when they present with signs or symptoms of deterioration
- In addition, heart failure nurses can help patients to learn to live with the consequences of heart failure, which means complying with a regimen including medication, diet and exercise, monitoring symptoms, seeking assistance when symptoms occur, and taking relevant actions in the case of exacerbation

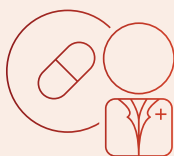

## Clinical pharmacists

- Clinical pharmacists have a well-established role in checking drug–drug interactions and treating possible adverse events when drugs are initiated
- Additional interventions by pharmacists can include providing advice to physicians in relation to appropriate drug regimens and dosages, and improving the patient's knowledge of heart failure and compliance to treatment

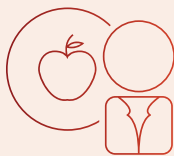

## Dietitians

- Dietitians can help to evaluate dietary intake, to formulate tailored advice with regards to specific patient needs (for example, combining a heart failure diet with a diabetes diet), and to improve patient compliance with prescribed nutrition recommendations
- Another aspect of dietary counselling is highlighting the importance of a healthy body weight
  - Being overweight or underweight are serious concerns in patients with heart failure
  - Weight reduction in obese heart failure patients can be a complex issue needing specialized guidance by a dietitian
  - On the other hand, preventing and treating cardiac cachexia may need more attention

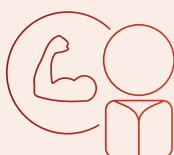

## Physical therapists

- Physical therapists can advise the patient with heart failure on reconditioning and training, and can also give practical advice on energy conservation
  - Patients that are seen at the heart failure clinic have often been 'de-conditioned' by, for example, prolonged bed rest or repeated hospitalizations
  - Others have been inactive because of fear of increasing symptoms or fear of exertion
    - These patients may benefit most from exercise programs, either in a cardiac rehabilitation center, in a hospital-based exercise program, or in a home exercise program
- Low intensity home walking exercise programs for patients with stable, moderate heart failure are safe, well accepted, and effective in improving functional status and global perception of symptoms

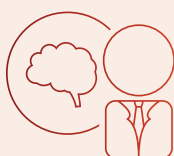

## Psychologists and/or social workers

- Psychologists and/or social workers can help patients cope with the effects of heart failure on their daily life
- Psychologists can also help doctors and heart failure nurses to identify symptoms of depression in patients with heart failure at an early stage
