# Supplementary material
Source: publisher figshare collection journal article supplement (https://karger.figshare.com/articles/dataset/_/7951154)
Supplement: Supplementary file 1 [file 1 › Item 6_Hospital Setting_interactive.pdf]

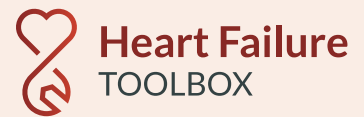

# Nursing chart

Patient name:

Room #:  Physician:

Diagnosis:  Allergies:

## • Situation

Isolation: ☐ None ☐ Contact ☐ Droplet ☐ Airborne ☐ Neutropenic

Admission date:  From:

Reason:

## • Background

Past medical history:

Psychosocial:

Decision maker:

## • Assessment

Pain (0–10)

Maximum temperature

Nocturnal:

Day:

Cardiac

EF:

BP:

Echo date:

Pulse:

Rhythm:

Hemodynamics

☐ A-Line

☐ CVP monitor

☐ Swann

Respiratory

☐ Clear ☐ ET ☐ Trach ☐ Ch T ☐ IS P/F ratio:

O<sub>2</sub> sat:

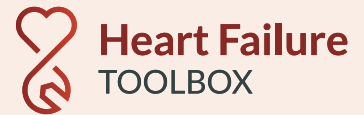

# Nursing chart

## • Assessment (continued)

### Vent settings

☐ Respiratory rate ☐ Acute respiratory distress syndrome

MODE  PS  Vt

FiO2  PEEP  RATE

### Gastrointestinal

☐ NG ☐ OG ☐ PEG ☐ LWS

Diet

### Genitourinary

☐ Foley ☐ Bedside commode ☐ Bathroom privileges ☐ Anuric ☐ Dialysis

NOCTURNALS

DAYS

In  Out  In  Out

In  Out  In  Out

In  Out  In  Out

In  Out  In  Out

Fluid balance

### Deep vein thrombosis prophylaxis

☐ Yes ☐ No

Please specify if yes:

### Intravenous medications

1)  @  5)  @

2)  @  6)  @

3)  @  7)  @

4)  @  8)  @

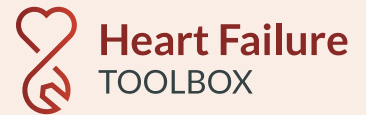

# Nursing chart

- **Assessment** *(continued)*

## Lab results

Blood glucose:

Na:

WBC:

K:

Hb:

Cr:

Hct:

BUN:

PLT:

CO<sub>2</sub>:

PT:

Others:

- **To-do list**

- **Misc**
