# Supplementary material
Source: publisher figshare collection journal article supplement (https://karger.figshare.com/articles/dataset/_/7951154)
Supplement: Supplementary file 1 [file 1 › Item 8_Hospital Setting.pdf]

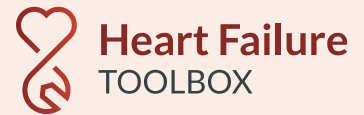

# Heart failure pre-discharge checklist

Patients with heart failure with reduced ejection fraction

To complete the following upon discharge – HEALTHCARE TEAM to tick appropriate boxes

## • Etiology of heart failure

- ☐ Ischemia
- ☐ Hypertension
- ☐ Idiopathic
- ☐ Viral myocarditis
- ☐ Alcohol intake
- ☐ Valvular heart disease
- ☐ Drug induced (*specify drug*):
- ☐ Peri-partum
- ☐ Infiltrative heart disease
- ☐ Other etiology (*please specify below*)

## • Comorbidities ☐ Yes ☐ No

If "YES", please tick the following boxes:

- ☐ Hyperlipidemia
- ☐ Diabetes mellitus
- ☐ Hypertension
- ☐ Anemia (Female: Hb <12g/dL; Male: Hb <14g/dL)
- ☐ Cerebral vascular disease
- ☐ Renal dysfunction
- ☐ Liver dysfunction
- ☐ AF
- ☐ Gout
- ☐ Others (*please specify below*)

## • Reasons for decompensation resulting in heart failure admission: (*May tick more than 1 box*)

- ☐ Poor compliance: ☐ Salt ☐ Fluid ☐ Medication
- ☐ Ischemia
- ☐ Fast AF
- ☐ Arrhythmia
- ☐ End stage heart failure
- ☐ Medical stress: ☐ Infection ☐ Surgery ☐ Anemia ☐ Others (*specify*)
- ☐ Indeterminate
- ☐ Other reason(s) (*specify*):

## • Medications – ACEI, ARB or ARNI:

- ☐ Yes, indicate class: ☐ ACEI ☐ ARB ☐ ARNI ☐ Not suitable (*select reason*):
- ☐ No (*select reason*):
- ☐ Patient not keen
- ☐ Indicate other reason(s):
- ☐ Advanced renal impairment
- ☐ Bilateral renal artery stenosis
- ☐ Hyperkalemia
- ☐ Low blood pressure
- ☐ Allergic reaction
- ☐ LVEF not appropriate

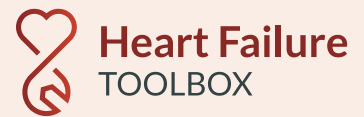

# Heart failure pre-discharge checklist

## • Medications – Beta-blocker:

☐ Yes☐ No (*select reason*):☐ Patient not keen☐ Indicate other reason(s):☐ Not suitable (*select reason*):☐ Low blood pressure☐ Bradyarrhythmia☐ Asthma/COPD☐ Peripheral vascular disease☐ Patient still in fluid overload☐ LVEF not appropriate

## • Medications – Aldosterone antagonist:

☐ Yes☐ No (*select reason*):☐ Patient not keen☐ Indicate other reason(s):☐ Not suitable (*select reason*):☐ LVEF not appropriate☐ NYHA I☐ Hyperkalemia☐ Advanced renal impairment

## • Medications – Hydralazine/nitrates:

☐ Yes☐ No (*select reason*):☐ Patient not keen☐ Indicate other reason(s):☐ Not suitable (*select reason*):☐ Low blood pressure☐ Allergic reaction☐ LVEF not appropriate

## • Medications – Ivabradine:

☐ Yes☐ No (*select reason*):☐ Patient not keen☐ Indicate other reason(s):☐ Not suitable (*select reason*):☐ Heart rate <70 bpm☐ Non sinus rhythm☐ Bradyarrhythmia and conduction disturbances☐ LVEF not appropriate☐ Severe hepatic impairment

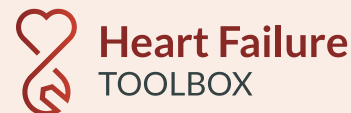

# Heart failure pre-discharge checklist

• LVEF assessment – LV function assessment done (within past 6 months or during hospitalization):

☐ Yes

☐ No (select reason):

☐ Patient not keen

☐ Indicate other reason(s):

☐ Plan for evaluation of LVEF after discharge:

☐ Yes

☐ No

• ICD/CRT-D – \*AICD/CRT-D has been offered to patient with LVEF  $\leq 35\%$ : (\*please delete accordingly)

☐ Yes

☐ No (indicate reason[s])

☐ Not applicable (select reason):

☐ LVEF not appropriate

☐ LVEF assessment not done

☐ Already has an ICD/CRT-D implanted

☐ Recent myocardial infarct  $< 40$  days

☐ Recent revascularization  $\leq 90$  days

☐ For CABG/AVR/heart transplant

☐ For PCI/revascularization

☐ Patient not keen

☐ Other reason(s):

• Follow-up appointments

Date

Time

Physician name:

### Discharge instructions from HEALTHCARE TEAM – Tick appropriate boxes

If no, please select the appropriate checkbox (*reasons shown below*) for variance

1. Patient/caregiver is not keen    2. Patient is medically unfit for teaching    Other reason(s)  
3. Caregiver is not available    4. Previously counselled within 6 months    (please specify)

|                                          |                              |              |                                                                                                             |                      |
|------------------------------------------|------------------------------|--------------|-------------------------------------------------------------------------------------------------------------|----------------------|
| Heart failure education by nursing staff | <input type="checkbox"/> Yes | Attended by: | <input type="text"/>                                                                                        | <input type="text"/> |
|                                          | <input type="checkbox"/> No  | Reason:      | <input type="checkbox"/> 1 <input type="checkbox"/> 2 <input type="checkbox"/> 3 <input type="checkbox"/> 4 | <input type="text"/> |
| Fluid restriction instruction            | <input type="checkbox"/> Yes | Attended by: | <input type="text"/>                                                                                        | <input type="text"/> |
|                                          | <input type="checkbox"/> No  | Reason:      | <input type="checkbox"/> 1 <input type="checkbox"/> 2 <input type="checkbox"/> 3 <input type="checkbox"/> 4 | <input type="text"/> |
| Diet (sodium restriction) instruction    | <input type="checkbox"/> Yes | Attended by: | <input type="text"/>                                                                                        | <input type="text"/> |
|                                          | <input type="checkbox"/> No  | Reason:      | <input type="checkbox"/> 1 <input type="checkbox"/> 2 <input type="checkbox"/> 3 <input type="checkbox"/> 4 | <input type="text"/> |
| Physical activity (Physiotherapist)      | <input type="checkbox"/> Yes | Attended by: | <input type="text"/>                                                                                        | <input type="text"/> |
|                                          | <input type="checkbox"/> No  | Reason:      | <input type="checkbox"/> 1 <input type="checkbox"/> 2 <input type="checkbox"/> 3 <input type="checkbox"/> 4 | <input type="text"/> |
| Weight management                        | <input type="checkbox"/> Yes | Attended by: | <input type="text"/>                                                                                        | <input type="text"/> |
|                                          | <input type="checkbox"/> No  | Reason:      | <input type="checkbox"/> 1 <input type="checkbox"/> 2 <input type="checkbox"/> 3 <input type="checkbox"/> 4 | <input type="text"/> |
| Symptom management                       | <input type="checkbox"/> Yes | Attended by: | <input type="text"/>                                                                                        | <input type="text"/> |
|                                          | <input type="checkbox"/> No  | Reason:      | <input type="checkbox"/> 1 <input type="checkbox"/> 2 <input type="checkbox"/> 3 <input type="checkbox"/> 4 | <input type="text"/> |
| Smoking cessation counseling             | <input type="checkbox"/> Yes | Attended by: | <input type="text"/>                                                                                        | <input type="text"/> |
|                                          | <input type="checkbox"/> No  | Reason:      | <input type="checkbox"/> 1 <input type="checkbox"/> 2 <input type="checkbox"/> 3 <input type="checkbox"/> 4 | <input type="text"/> |
| Medication instructions (Pharmacist)     | <input type="checkbox"/> Yes | Attended by: | <input type="text"/>                                                                                        | <input type="text"/> |
|                                          | <input type="checkbox"/> No  | Reason:      | <input type="checkbox"/> 1 <input type="checkbox"/> 2 <input type="checkbox"/> 3 <input type="checkbox"/> 4 | <input type="text"/> |

- Reasons why pre-discharge checklist cannot be completed

- ☐ Death
- ☐ Patient unwilling to join heart failure program or refuses out-patient follow up
- ☐ Other serious complication(s) of heart failure (*specify*):

\_\_\_\_\_

- ☐ Others, (specify):

\_\_\_\_\_

Healthcare team member name:

\_\_\_\_\_

Healthcare team member signature:

\_\_\_\_\_

Date:

\_\_\_\_\_
