# Supplementary material
Source: publisher figshare collection journal article supplement (https://karger.figshare.com/articles/dataset/_/7951154)
Supplement: Supplementary file 1 [file 1 › Item 9a_Hospital Setting.pdf]

# Quality measures for heart failure care in hospital

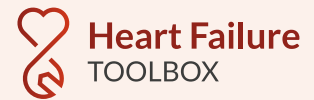

- Key performance indicators (KPIs) are items that are used to assess a measurable aspect of patient care as a guide to assessing performance of the healthcare organization or individual practitioners within the organization
- A KPI is a measure to quantify the degree of adherence to a standard of care
- KPIs for heart failure should be measured on a yearly basis and findings compared from year to year to evaluate the adherence to guidelines. The main KPIs that should be quantified are:
  - ACEI, ARB or ARNI use in hospital and among discharged patients
  - Beta-blocker use in hospital and among discharged patients
  - MRA use
  - In-hospital mortality rate
  - Length of hospital stay
  - Provision of discharge education and discharge instruction
  - Evaluation of LV systolic function
  - Use of anticoagulation therapy in patients with atrial fibrillation and heart failure
