# Supplementary material
Source: publisher figshare collection journal article supplement (https://karger.figshare.com/articles/dataset/_/7951154)
Supplement: Supplementary file 1 [file 1 › Item 9b_Outpatient Setting.pdf]

# Quality measures for heart failure outpatients

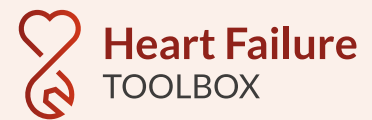

- Key performance indicators (KPIs) are items that are used to assess a measurable aspect of patient care as a guide to assessing performance of the healthcare organization or individual practitioners within the organization
- A KPI is a measure to quantify the degree of adherence to a standard of care
- KPIs for heart failure should be measured on a yearly basis and findings compared from year to year to evaluate the adherence to guidelines. The main KPIs that should be quantified are:
  - Evaluation of LV systolic function
  - Assessment of symptoms and activity
  - Provision of patient self-care education
  - Use of beta-blocker therapy
  - Use of ACEI/ARB or ARNI therapy
  - Use of MRA therapy
  - Provision of counseling about ICD
  - Heart failure mortality rate
  - Heart failure admission rate
  - Use of anticoagulation therapy in patients with atrial fibrillation and heart failure
