# Supplementary material
Source: publisher figshare collection journal article supplement (https://karger.figshare.com/articles/dataset/_/7951154)
Supplement: Supplementary file 1 [file 1 › Item 10_Outpatient Setting.pdf]

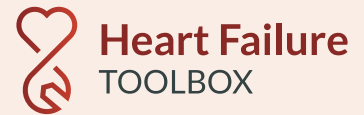

# Heart failure disease management program Heart failure patient chart

Name:

Patient ID number:

## Demographic Information

Enrollment date:

MM/DD/YYYY

HF- clinic site:

### • Patient's information

Patient name:

Gender:

☐

Male

☐

Female

Date of birth:

MM/DD/YYYY

Address:

Mobile No:

Home No:

Healthcare program:

### • Caregiver's information

Caregiver name:

Relationship:

Mobile No:

Home No:

### • Heart failure team information

HF nursing specialist:

Primary physician:

Referral physician:

Additional members:

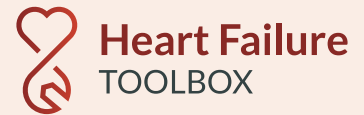

# Heart failure disease management program Heart failure patient chart

## Medical Information

HF diagnosis date:

MM/DD/YYYY

Ejection fraction:

### • HF management

Name and dose

|                     |                              |                             |  |
|---------------------|------------------------------|-----------------------------|--|
| ACEIs               | <input type="checkbox"/> Yes | <input type="checkbox"/> No |  |
| ARBs                | <input type="checkbox"/> Yes | <input type="checkbox"/> No |  |
| ARNI                | <input type="checkbox"/> Yes | <input type="checkbox"/> No |  |
| Beta-blockers       | <input type="checkbox"/> Yes | <input type="checkbox"/> No |  |
| Diuretics           | <input type="checkbox"/> Yes | <input type="checkbox"/> No |  |
| Ivabradine          | <input type="checkbox"/> Yes | <input type="checkbox"/> No |  |
| Digoxin             | <input type="checkbox"/> Yes | <input type="checkbox"/> No |  |
| MRAs                | <input type="checkbox"/> Yes | <input type="checkbox"/> No |  |
| Hydralazine/nitrate | <input type="checkbox"/> Yes | <input type="checkbox"/> No |  |
| Anticoagulation     | <input type="checkbox"/> Yes | <input type="checkbox"/> No |  |
| CRT                 | <input type="checkbox"/> Yes | <input type="checkbox"/> No |  |
| ICD                 | <input type="checkbox"/> Yes | <input type="checkbox"/> No |  |

## Past medical history

Non-HF problem list

Non-HF medication list

|  |  |
|--|--|
|  |  |
|  |  |
|  |  |
|  |  |
|  |  |
|  |  |
|  |  |
|  |  |
|  |  |



# Heart failure disease management program Heart failure patient chart

Date of visit

MM/DD/YYYY

Height:  Weight:   
 Blood pressure:  Pulse:  O<sub>2</sub> sat:   
 Symptoms:   
 NYHA class: ☐ I ☐ II ☐ III ☐ IV Smoking ☐ Yes ☐ No  
 Leg edema: ☐ 0 ☐ +1 ☐ +2 ☐ +3 ☐ +4  
 Hospitalization date:  MM/DD/YYYY Length of stay:

## • Laboratory tests

Na:   
 K:   
 Cr:   
 BNP /NT-proBNP:   
 WBC:   
 Hb:   
 Hct:   
 Ferritin:   
 TSAT:   
 EKG available ☐ Yes ☐ No Echocardiography available ☐ Yes ☐ No  
 Cardiac cath available ☐ Yes ☐ No  
 Last ejection fraction:  % and date:  MM/DD/YYYY

## • Teaching by HF nurse specialist (select all applicable)

☐ Low salt diet ☐ Medication compliance ☐ Smoking cessation  
☐ Daily weight ☐ Water intake  
☐ Daily exercise ☐ Vital signs monitoring
