# Supplementary material
Source: publisher figshare collection journal article supplement (https://karger.figshare.com/articles/dataset/_/7951154)
Supplement: Supplementary file 1 [file 1 › Item 10_Outpatient Setting_interactive.pdf]

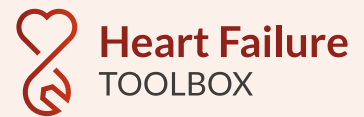

# Heart failure disease management program Heart failure patient chart

Name:

Patient ID number:

## Demographic Information

Enrollment date:

HF- clinic site:

### • Patient's information

Patient name:

Gender:

☐

Male

☐

Female

Date of birth:

Address:

Mobile No:

Home No:

Healthcare program:

### • Caregiver's information

Caregiver name:

Relationship:

Mobile No:

Home No:

### • Heart failure team information

HF nursing specialist:

Primary physician:

Referral physician:

Additional members:

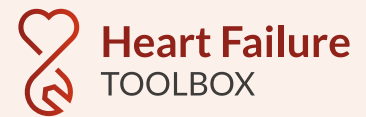

# Heart failure disease management program Heart failure patient chart

## Medical Information

HF diagnosis date:

Ejection fraction:

### • HF management

Name and dose

|                     |                              |                             |                      |
|---------------------|------------------------------|-----------------------------|----------------------|
| ACEIs               | <input type="checkbox"/> Yes | <input type="checkbox"/> No | <input type="text"/> |
| ARBs                | <input type="checkbox"/> Yes | <input type="checkbox"/> No | <input type="text"/> |
| ARNI                | <input type="checkbox"/> Yes | <input type="checkbox"/> No | <input type="text"/> |
| Beta-blockers       | <input type="checkbox"/> Yes | <input type="checkbox"/> No | <input type="text"/> |
| Diuretics           | <input type="checkbox"/> Yes | <input type="checkbox"/> No | <input type="text"/> |
| Ivabradine          | <input type="checkbox"/> Yes | <input type="checkbox"/> No | <input type="text"/> |
| Digoxin             | <input type="checkbox"/> Yes | <input type="checkbox"/> No | <input type="text"/> |
| MRAs                | <input type="checkbox"/> Yes | <input type="checkbox"/> No | <input type="text"/> |
| Hydralazine/nitrate | <input type="checkbox"/> Yes | <input type="checkbox"/> No | <input type="text"/> |
| Anticoagulation     | <input type="checkbox"/> Yes | <input type="checkbox"/> No | <input type="text"/> |
| CRT                 | <input type="checkbox"/> Yes | <input type="checkbox"/> No |                      |
| ICD                 | <input type="checkbox"/> Yes | <input type="checkbox"/> No |                      |

## Past medical history

Non-HF problem list

  
  
  
  
  
  
  


Non-HF medication list

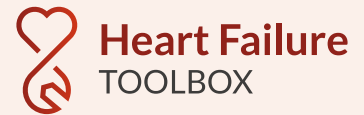

# Heart failure disease management program Heart failure patient chart

Date of visit

Height:  Weight:

Blood pressure:  Pulse:  O<sub>2</sub> sat:

Symptoms:

NYHA class: ☐ I ☐ II ☐ III ☐ IV Smoking ☐ Yes ☐ No

Leg edema: ☐ 0 ☐ +1 ☐ +2 ☐ +3 ☐ +4

Hospitalization date:  Length of stay:

## • Laboratory tests

Na:

K:

Cr:

BNP /NT-proBNP:

WBC:

Hb:

Hct:

Ferritin:

TSAT:

EKG available ☐ Yes ☐ No Echocardiography available ☐ Yes ☐ No

Cardiac cath available ☐ Yes ☐ No

Last ejection fraction:  on date:

## • Teaching by HF nurse specialist (select all applicable)

☐ Low salt diet ☐ Medication compliance ☐ Smoking cessation

☐ Daily weight ☐ Water intake

☐ Daily exercise ☐ Vital signs monitoring
